# Supplementary material for: Gut microbiota dysbiosis is associated with altered tryptophan metabolism and dysregulated inflammatory response in COVID-19
Source: PubMed Central journal article supplement (PMC11291933; doi:10.1038/s41522-024-00538-0), 2024-08-01
Supplement: 41522_2024_538_MOESM1_ESM.pdf [file 41522_2024_538_MOESM1_ESM.pdf]

# **Gut microbiota dysbiosis is associated with altered tryptophan metabolism and dysregulated inflammatory response in COVID-19**

Supplemental Information

[Supplementary Figure 1: Oropharyngeal microbiota differential abundance analysis and sequence data processing, related to Figure 2](#)

[Supplementary Figure 2: IFN response in COVID-19 patients, related to Figure 3](#)

[Supplementary Figure 3: Metabolite associations with disease severity at both early and late timepoints, related to Figure 4](#)

[Supplementary Table 1: Cohort characteristics, related to Table 1](#)

[Supplementary Table 2: Clinical lab parameters, related to Figure 1](#)

[Supplementary Table 3: Taxonomic profiles, related to Figures 2, Supplementary Figure 1](#)

[Supplementary Table 4: Immune response profiles, related to Figures 3, Supplementary Figure 2](#)

[Supplementary Table 5: Metabolite profiles, related to Figures 4, Supplementary Figure 3](#)

[Supplementary Table 6: Results from statistical analysis with clinical variables, related to Figures 2-4, Supplementary Figures 1-3](#)

[Supplementary Table 7: Integrated statistical analysis results, related to Figure 5](#)

[Supplementary Table 8: Quality Control reporting of metabolomics data according to mQACC standards](#)

[Supplementary Table 9: Ultra-high performance liquid chromatography \(UHPLC\) gradient for LC part](#)

[Supplementary Table 10: Ultra-high performance liquid chromatography \(UHPLC\) gradient for flow injection \(FIA\) part](#)

[Supplementary Table 11: Acquisition method parameters for liquid chromatography \(LC\) and flow injection analysis \(FIA\)](#)

[Supplementary Table 12: List of metabolite derivatives and their biological groups used for reference search](#)

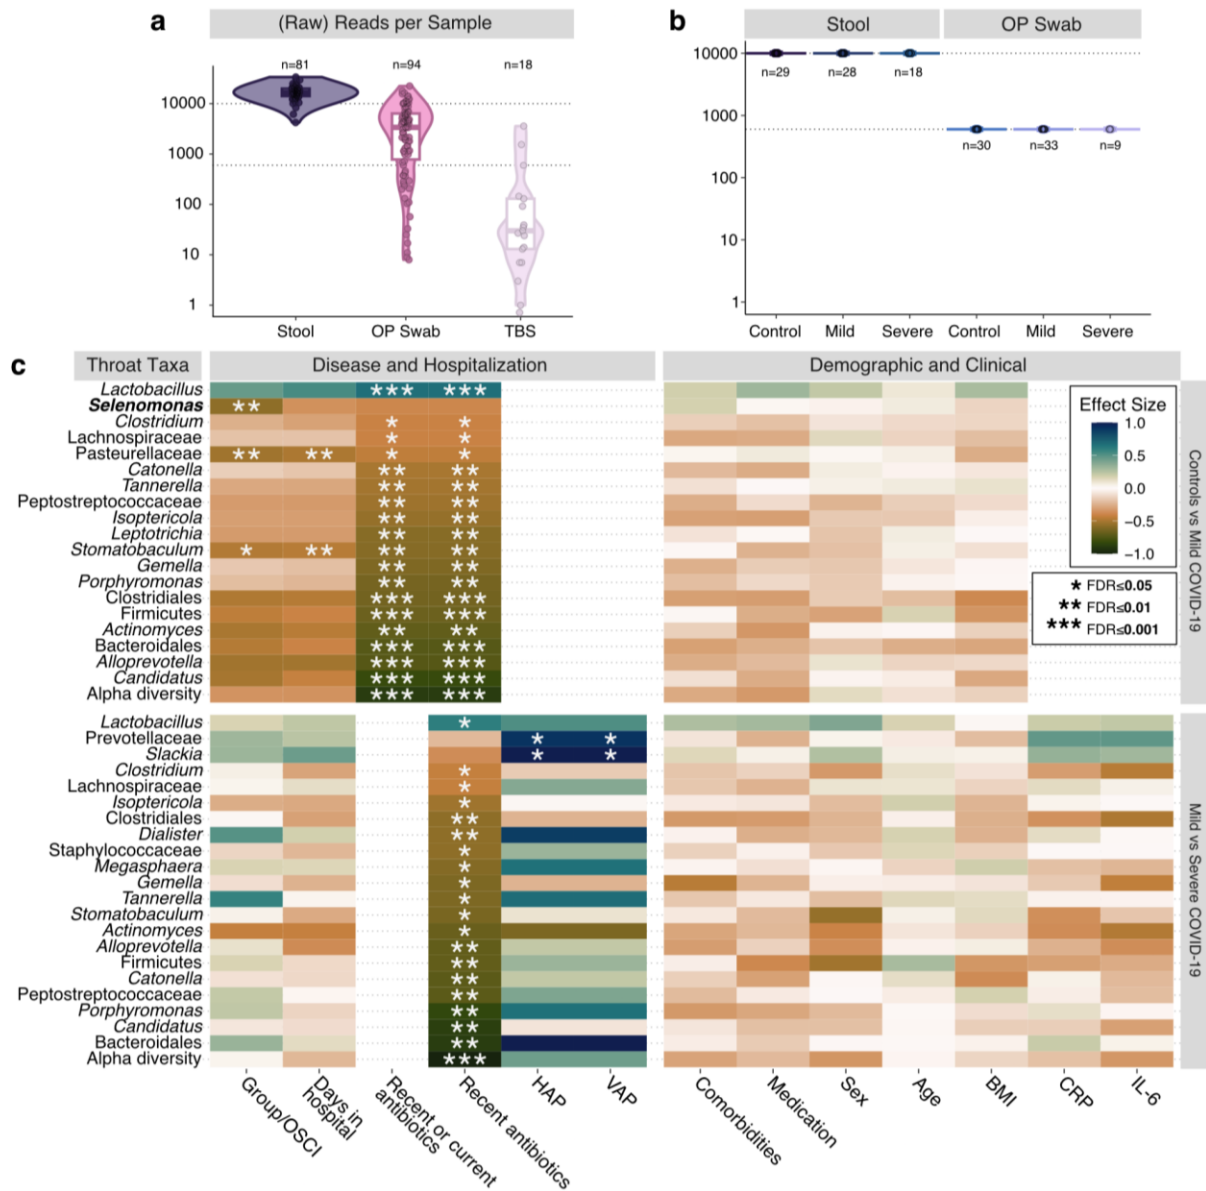

**Supplementary Figure 1: Airway samples in COVID-19 patients had far fewer reads than stool samples, and were strongly sensitive to antibiotics.** **a**) Raw (not rarefied) reads per sample, grouped by sample type. Grey dotted lines show selected rarefaction depths for stool and OP swabs, which resulted in removal of 6 and 22 samples, respectively. As only 5/18 TBS samples had more than 100 raw reads, all of these samples were excluded from further analysis. **b**) Rarefaction resulted in n=75 stool samples and n=72 OP swabs for downstream analysis (see main text **Fig. 2**). **c**) Subset of significant results from our differential abundance and confounder testing of the throat microbiota (see main text **Fig. 2c** caption, **Methods**, and **Table S6** for the full results). With the exception of P07 and P09, all mild COVID-19 patients received antibiotics shortly before intake, but not during their hospital stay (see main text **Fig. 1**), hence why the “recent” and “recent or current” antibiotics variables show practically identical signals (likewise, the same three patients had HAP/VAP). All but one patient with COVID-19 had recently received or was currently receiving antibiotics, making it impossible to distinguish mild from severe patients with respect to this variable. HAP, VAP, CRP, and IL-6 were either not relevant or not recorded for the control individuals. HAP: hospital-acquired pneumonia; VAP: ventilator-associated pneumonia; OSCI: ordinal scale for clinical improvement

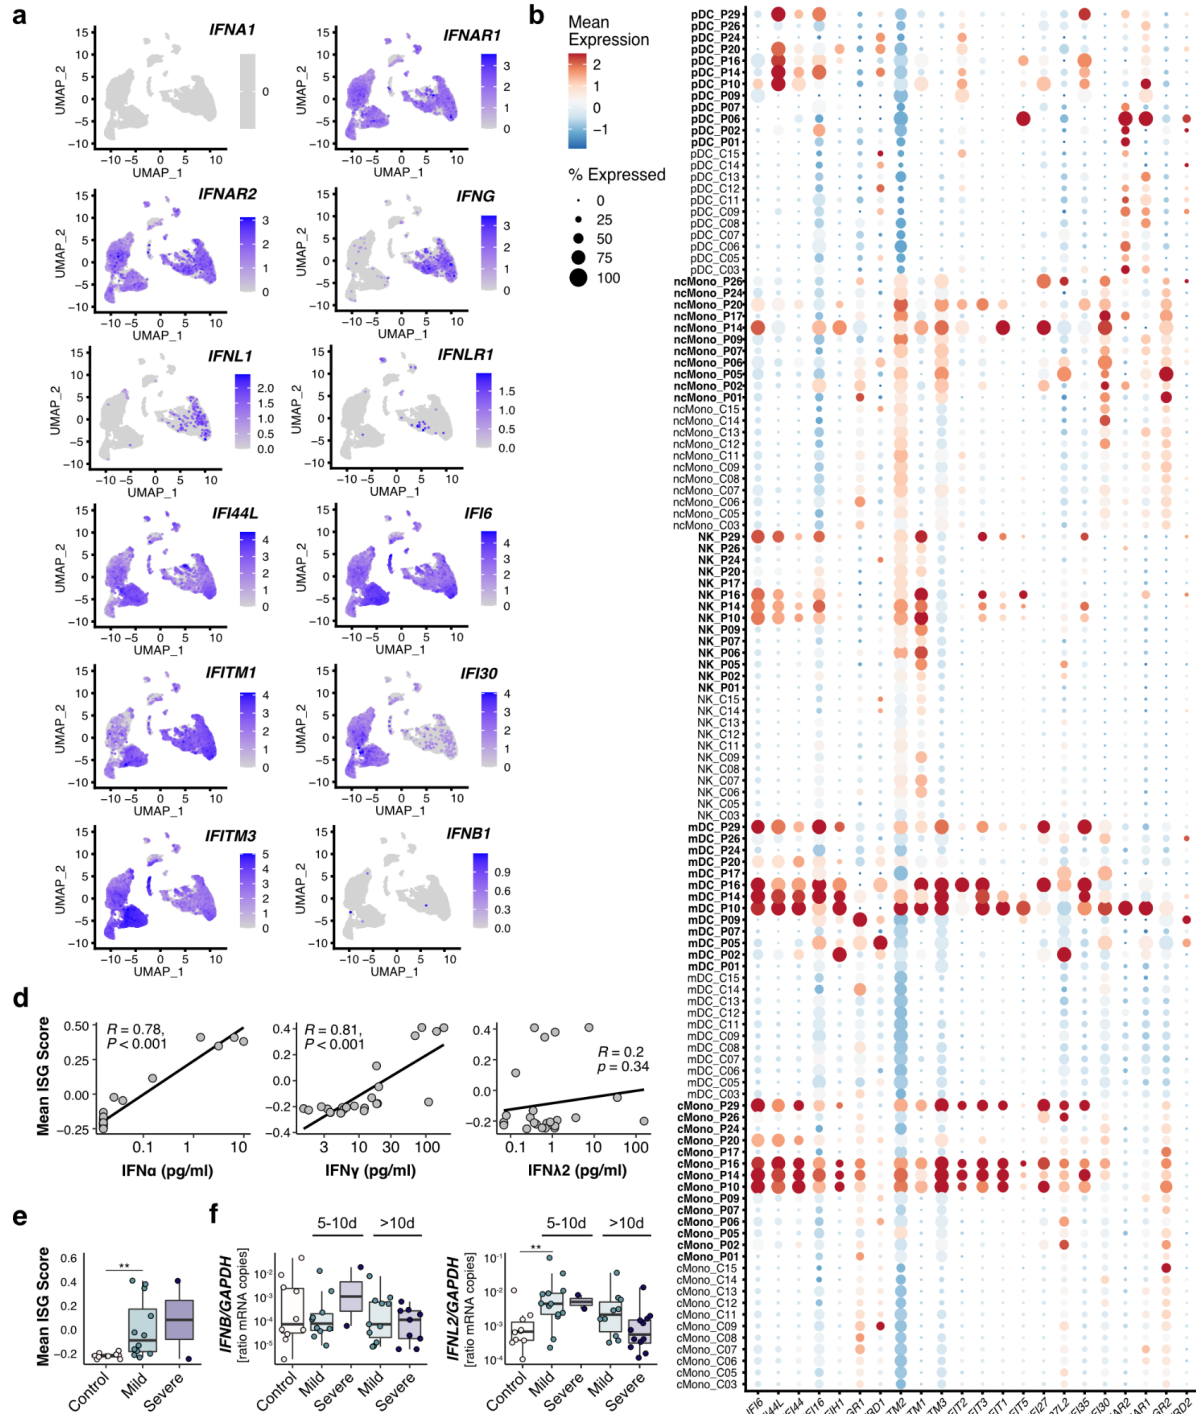

**Supplementary Figure 2: IFN response in COVID-19 patients.** **a)** Expression of IFN-related genes projected onto the UMAP of cell (sub)types of PBMCs identified by scRNAseq from 14 COVID-19 patients and 11 controls. **b)** Dot plots indicating expression of IFN-related genes in different cell types of PBMCs from patients and controls. **c)** Linear regression analysis of the ISG score (as shown in d versus levels of type I, II, and III IFN levels in plasma. **d)** ISG score (calculated by applying Seurat function *AddModuleScore* to IFN-stimulated genes) in PBMCs from controls and patients with mild and severe COVID-19. **e)** Relative oropharyngeal expression of type I and III IFNs in controls and patients with mild and severe COVID-19 at the early (<10 d after symptom onset) and late (>10 d after symptom onset) phase of infection. See also main text **Fig. 3**.

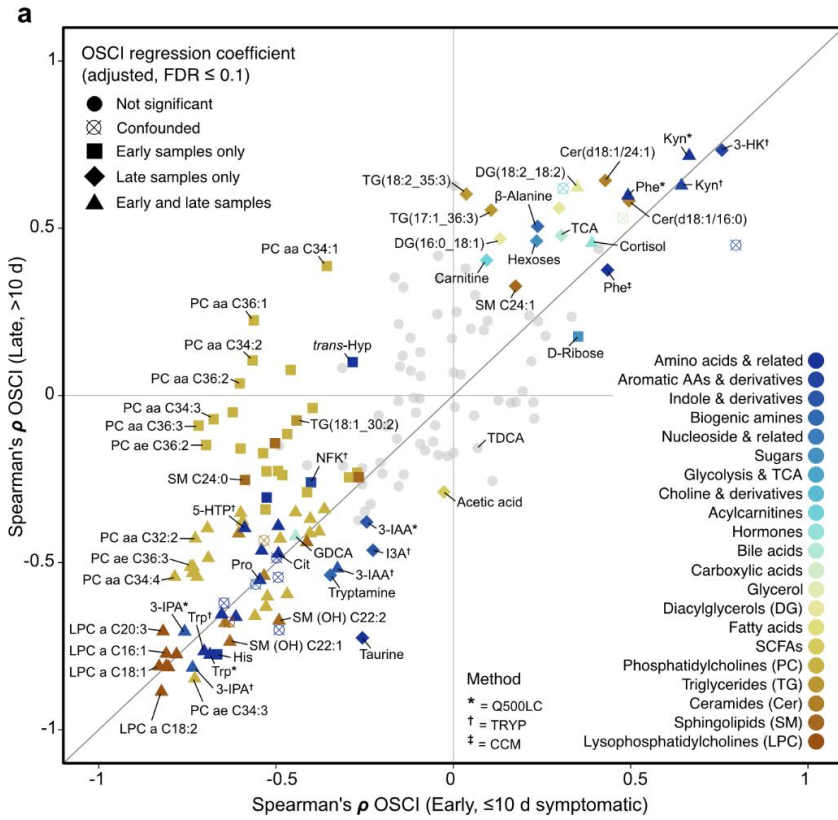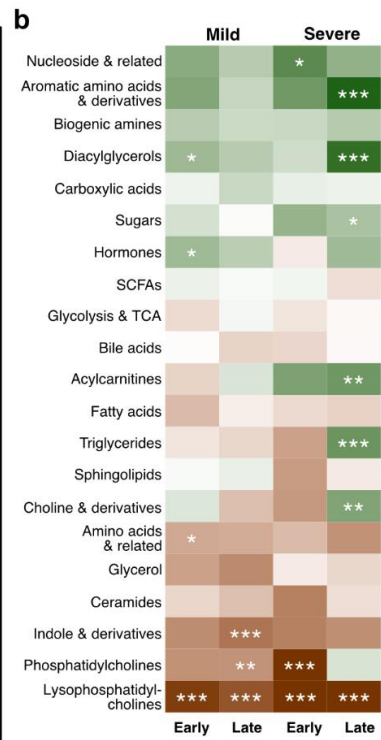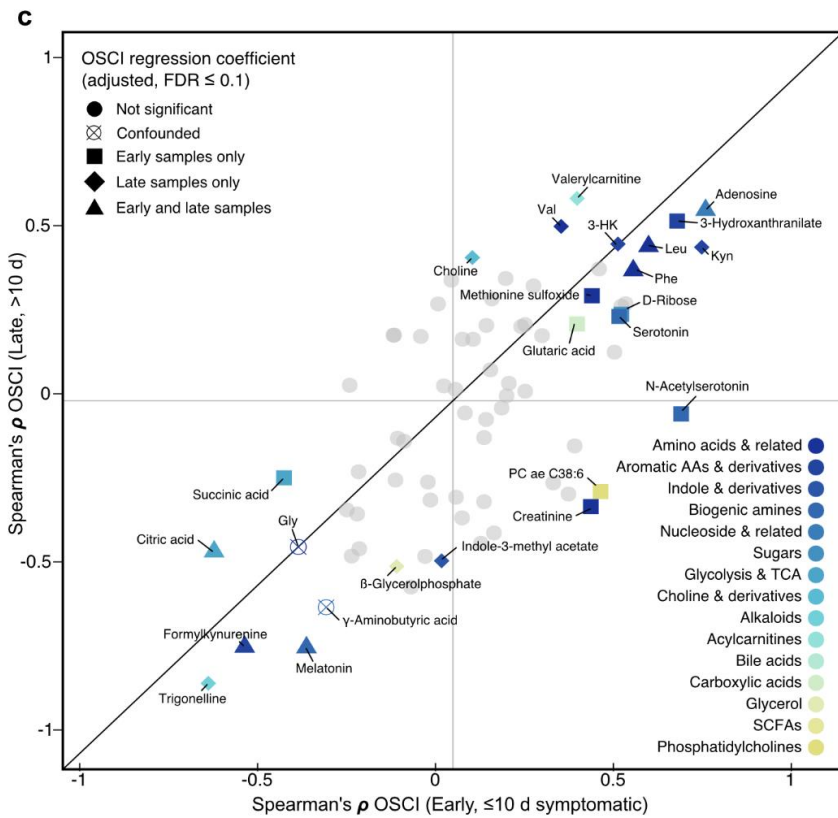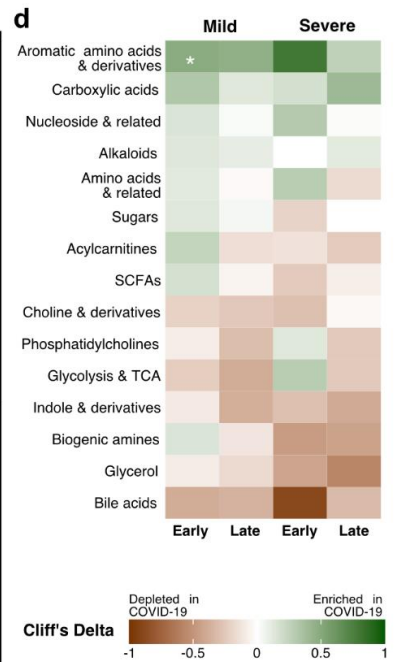

**Supplementary Figure 3: Metabolite associations with disease severity at both early and late timepoints. a)**

Spearman correlations between plasma metabolite concentrations and OSCI scores at the time of sampling were calculated using either early (n=26) or late (n=40) subsets of COVID-19 patient samples and healthy controls (n=30), and are shown contrasted with one another. Metabolites are annotated to show their biochemical class and analytical method. Shapes were assigned according to the integrated output from our modeling with clinical variables in each subset (early and late) separately, after adjusting for case-control disease status. Compounds closer to the diagonal line displayed consistent severity correlations regardless of sample timepoint, while levels of several phosphatidylcholines were negatively correlated with disease severity in early samples only. **b)** Cliff's delta effect sizes for different subsets of COVID-19 patients compared to controls for each chemical class. Adjusted significances from Mann-Whitney U tests which were not confounded from our modeling analysis with clinical covariates are depicted (FDR<0.1=\*, FDR<0.01=\*\*, FDR<0.001=\*\*\*). **c-d)** The same as in a and b except for urine metabolites. See also main text Fig. 4. Phe: phenylalanine, Pro: proline, Cit: citrullin, *trans*-Hyp: *trans*-4-hydroxyproline, Trp: tryptophan, Kyn: kynurenine, 5-HTP: 5-hydroxytryptophan, 3-HK: 3-hydroxykynurenine, NFK: N-Formylkynurenine, TDCA: taurodeoxycholic acid, GDCA: glycodeoxycholic acid, TCA: taurocholic acid, 3-IPA: indole-3-propionic acid, 3-IAA: indole-3-acetic acid, I3A: indole-3-carboxaldehyde; HAP: hospital-acquired pneumonia

The following tables are currently available at [www.github.com/sxmorgan/pa-covid-multi-omics](http://www.github.com/sxmorgan/pa-covid-multi-omics).

**Supplementary Table 1 (S1): Cohort characteristics, related to Table 1**

**Supplementary Table 2 (S2): Clinical lab parameters, related to Figure 1**

**Supplementary Table 3 (S3): Taxonomic profiles, related to Figure 2**

**Supplementary Table 4 (S4): Immune response profiles, related to Figures 3, Supplementary Figure 2**

**Supplementary Table 5 (S5): Metabolite profiles, related to Figures 4, Supplementary Figure 3**

**Supplementary Table 6 (S6): Results from statistical analysis with clinical variables, related to Figures 2-4, Supplementary Figures 1 and 3**

**Supplementary Table 7 (S7): Integrated statistical analysis results, related to Figure 5**

**Supplementary Table 8 (S8): Quality Control reporting of metabolomics data according to mQACC standards**

**Supplementary Table 9: Ultra-high performance liquid chromatography (UHPLC) gradient for LC part**

| No | LC1        |               |       |       | LC2        |               |       |       |
|----|------------|---------------|-------|-------|------------|---------------|-------|-------|
|    | Time [min] | Flow [mL/min] | A [%] | B [%] | Time [min] | Flow [mL/min] | A [%] | B [%] |
| 1  | 0.00       | 0.8           | 100   | 0     | 0.00       | 0.8           | 100   | 0     |
| 2  | 0.25       | 0.8           | 100   | 0     | 0.25       | 0.8           | 100   | 0     |
| 3  | 1.50       | 0.8           | 88    | 12    | 0.50       | 0.8           | 75    | 25    |
| 4  | 2.70       | 0.8           | 82.5  | 17.5  | 2.00       | 0.8           | 50    | 50    |
| 5  | 4.00       | 0.8           | 50    | 50    | 3.00       | 0.8           | 25    | 75    |
| 6  | 4.50       | 0.8           | 0     | 100   | 3.50       | 0.8           | 0     | 100   |
| 7  | 4.70       | 1.0           | 0     | 100   | 4.70       | 1.0           | 0     | 100   |
| 8  | 5.00       | 1.0           | 0     | 100   | 5.00       | 1.0           | 0     | 100   |
| 9  | 5.10       | 1.0           | 100   | 0     | 5.10       | 1.0           | 100   | 0     |
| 10 | 5.80       | 1.0           | 100   | 0     | 5.80       | 1.0           | 100   | 0     |

**Supplementary Table 10: Ultra-high performance liquid chromatography (UHPLC) gradient for flow injection (FIA) part**

| No | Time [min] | Flow [mL/min] | A [%] | B [%] |
|----|------------|---------------|-------|-------|
| 1  | 0.0        | 0.03          | 0     | 100   |
| 2  | 1.6        | 0.03          | 0     | 100   |
| 3  | 2.4        | 0.20          | 0     | 100   |
| 4  | 2.8        | 0.20          | 0     | 100   |
| 5  | 3.0        | 0.03          | 0     | 100   |

**Supplementary Table 11: Acquisition method parameters for liquid chromatography (LC) and flow injection analysis (FIA)**

| Option            | Parameter                      | LC1         | LC2      | FIA1     | FIA2     |
|-------------------|--------------------------------|-------------|----------|----------|----------|
| MS                | Scan type                      | MRM         | MRM      | MRM      | MRM      |
|                   | Polarity                       | Positive    | Negative | Positive | Negative |
|                   | MRM detection window (sec)     | 30          | 30       | -        | -        |
|                   | Duration (min)                 | 5.45        | 5.45     | 2.95     | 2.95     |
|                   | Delay time (sec)               | 0           | 0        | 0        | 0        |
|                   | Cycle (sec)                    | 0.25        | 0.15     | N/A      | N/A      |
| Advanced MS       | Resolution Q1                  | Unit        | Unit     | Unit     | Unit     |
|                   | Resolution Q3                  | Unit        | Unit     | Unit     | Unit     |
|                   | Intensity threshold            | 0           | 0        | 0        | 0        |
|                   | Setting time (ms)              | 0           | 0        | 0        | 0        |
|                   | Pause between mass ranges (ms) | 2           | 2        | 5.007    | 3        |
|                   | Source/ gas                    | Curtain gas | 45       | 20       | 20       |
| Collision gas     |                                | 9           | 8        | 9        | 9        |
| Ion spray voltage |                                | 5500        | -4500    | 5500     | 5500     |
| Temperature       |                                | 500         | 650      | 200      | 350      |
| Ion source gas 1  |                                | 60          | 40       | 40       | 30       |
| Ion source gas 2  |                                | 70          | 40       | 50       | 85       |

MS: mass spectrometry

**Supplementary Table 12: List of metabolite derivatives and their biological groups used for reference search**

| <b>Group</b> | <b>Metabolite</b> | <b>Abbreviation</b> | <b>Detected as</b> |
|--------------|-------------------|---------------------|--------------------|
| AA           | Alanine           | Ala                 | 3TMS               |
|              |                   |                     | 2TMS               |
| AA           | Asparagine        | Asn                 | 2TMS               |
| AA           | Aspartic acid     | Asp                 | 2TMS               |
|              |                   |                     | 3TMS               |
| AA           | Cysteine          | Cys                 | 3TMS               |
| AA           | Glycine           | Gly                 | 2TMS               |
|              |                   |                     | 3TMS               |
| AA           | Isoleucine        | Ile                 | 1TMS               |
|              |                   |                     | 2TMS               |
| AA           | Leucine           | Leu                 | 1TMS               |
|              |                   |                     | 2TMS               |
| AA           | Lysine            | Lys                 | 3TMS               |
| AA           | Methionine        | Met                 | 1TMS               |
|              |                   |                     | 2TMS               |
| AA           | Phenylalanine     | Phe                 | 1TMS               |
|              |                   |                     | 2TMS               |
| AA           | Proline           | Pro                 | 1TMS               |
|              |                   |                     | 2TMS               |
| AA           | Serine            | Ser                 | 2TMS               |
|              |                   |                     | 3TMS               |
|              |                   |                     | 4TMS               |
| AA           | Threonine         | Thr                 | 2TMS               |
|              |                   |                     | 3TMS               |
| AA           | Tryptophan        | Trp                 | 2TMS               |
| AA           | Tyrosine          | Tyr                 | 3TMS               |
| AA           | Valine            | Val                 | 1TMS               |
|              |                   |                     | 2TMS               |



|            |                            |           |            |
|------------|----------------------------|-----------|------------|
| Glycerol   | Dihydroxyacetone phosphate | DHAP      | 1MeOX 3TMS |
| Glycerol   | Glycerol                   | Glyc      | 3TMS       |
| Glycerol   | Glycerol-3-phosphate       | Glyc3P    | 4TMS       |
| Glycolysis | Fructose-6-phosphate       | F6P       | 1MeOX 6TMS |
| Glycolysis | Glucose-6-phosphate        | G6P       | 1MeOX 6TMS |
| Glycolysis | Glyceric acid-3-phosphate  | GA3P      | 4TMS       |
| Glycolysis | Lactic acid                | Lac       | 2TMS       |
| Glycolysis | Phosphoenolpyruvic acid    | PEP       | 3TMS       |
| Glycolysis | Pyruvic acid               | Pyr       | 1MeOX 1TMS |
| Nucleobase | Adenine                    | Adenine   | 2TMS       |
| Nucleobase | Uracil                     | Uracil    | 2TMS       |
| Nucleoside | Adenosine                  | Adenosine | 3TMS       |
|            |                            |           | 4TMS       |
| Nucleoside | Cytosine                   | Cytosine  | 2TMS       |
| Others     | Butanoic acid, 3-hydroxy-  | But3h     | 2TMS       |
| Others     | Butanoic acid, 4-amino-    | But4am    | 3TMS       |
| Others     | Erythritol                 | Ery       | 4TMS       |
| Others     | Glutaric acid              | Glut      | 2TMS       |
| Others     | Glyceric acid              | Glyc      | 3TMS       |
| PPP        | Ribose-5-phosphate         | R5P       | 1MeOX 5TMS |
| PPP        | Ribose                     | Ribose    | 1MeOX 4TMS |
| TCA        | Citric acid                | Cit       | 4TMS       |
| TCA        | Fumaric acid               | Fum       | 2TMS       |
| TCA        | Glutaric acid, 2-hydroxy-  | 2HG       | 3TMS       |
| TCA        | Glutaric acid, 2-oxo-      | aKG       | 1MeOX 2TMS |
| TCA        | Malic acid                 | Mal       | 3TMS       |
| TCA        | Succinic acid              | Suc       | 2TMS       |

AA: Amino acids. PPP: Pentose phosphate pathway. TCA: Tricarboxylic acid cycle. TMS: Trimethylsilyl derivatives. MeOX: Methoxyamine hydrochloride
